# Supplementary material
Source: PubMed Central journal article supplement (PMC3686509)

Table S1

*DN-Rab11* wing phenotypes

| <i>ptc-Gal4</i><br><i>PTG80</i><br>plus     | Percent of wings showing the following phenotypes |         |         |       |     |           |            |                  |                     |                         |                        |            |                 |
|---------------------------------------------|---------------------------------------------------|---------|---------|-------|-----|-----------|------------|------------------|---------------------|-------------------------|------------------------|------------|-----------------|
|                                             | Genotype                                          | larval  | Day 1   | Day 2 | n   | Thin hair | Split hair | Misaligned hairs | Multiple hair cells | <i>fz/stan</i> polarity | Thin <i>ptc</i> domain | Eroded ACV | Polyploid cells |
| <i>UAS-DN-Rab11</i>                         | 21 °C                                             | 21 °C   | 21 °C   | 19    | 0   | 0         | 0          | 0                | 0                   | 0                       | 0                      | 0          | 0               |
| <i>UAS-DN-Rab11</i>                         | 27.5 °C                                           | 27.5 °C | 27.5 °C | 44    | 64  | 23        | 39         | 100              | 82                  | 100                     | 100                    | 100        | 11              |
| <i>UAS-DN-Rab11</i>                         | 25 °C                                             | 25 °C   | 25 °C   | 34    | 9   | 12        | 6          | 29               | 0                   | 0                       | 12                     | 0          | 0               |
| <i>UAS-DN-Rab11</i> ;<br><i>Rab11-ex1/+</i> | 25 °C                                             | 25 °C   | 25 °C   | 7     | 29  | 29        | 86         | 57               | 14                  | 100                     | 100                    | 100        | 0               |
| <i>UAS-DN-Rab11</i>                         | 21 °C                                             | 27.5 °C | 27.5 °C | 16    | 63  | 69        | 31         | 63               | 0                   | 0                       | 6                      | 0          | 0               |
| <i>UAS-DN-Rab11</i>                         | 21 °C                                             | 21 °C   | 27.5 °C | 29    | 48  | 28        | 48         | 7                | 0                   | 0                       | 0                      | 0          | 0               |
| <i>UAS-DN-Rab11</i>                         | 27.5 °C                                           | 21 °C   | 21 °C   | 33    | 3   | 6         | 0          | 0                | 0                   | 0                       | 0                      | 0          | 0               |
| <i>UAS-DN-Rab11</i>                         | 27.5 °C                                           | 27.5 °C | 21 °C   | 9     | 0   | 11        | 0          | 78               | 67                  | 78                      | 67                     | 67         | 0               |
| <i>UAS-DN-Rab11</i>                         | 27.5 °C                                           | 29.5 °C | 29.5 °C | 22    | 77  | 45        | 45         | 100              | 77                  | 100                     | 100                    | 100        | 14              |
| <i>UAS-DN-Rab11</i>                         | 25 °C                                             | 29.5 °C | 29.5 °C | 10    | 100 | 50        | 30         | 70               | 80                  | 20                      | 100                    | 100        | 0               |

Table S2

Genes that did not give a *dyl*, *kkv* or *ect* hair phenotype.

| Gene    | RNAi stock | Reason for    |
|---------|------------|---------------|
| CG10283 | V101168    | Up 40         |
| CG10287 | V102518    | Up 32 more 40 |
| CG10425 | V109284    | Up 40         |
| CG10670 | V47601     | Up 32         |
| CG10717 | V30288     | Up 32 more 40 |
| CG11498 | V31514     | Up 40         |
| CG11836 | V109470    | Up 40         |
| CG12063 | V106568    | Up 40         |
| CG12256 | V109715    | Up 32         |
| CG12432 | V106789    | Up 32         |
| CG12508 | V109545    | Up 32         |
| CG1275  | V105418    | Up 32 more 40 |
| CG12811 | V101055    | Up 40         |
| CG12880 | V106407    | Up 32         |
| CG13081 | V1443      | Up 32         |
| CG13082 | V109511    | Up 32         |
| CG13796 | V102516    | Up 32         |
| CG14681 | V49663     | Up 32 more 40 |
| Cad89D  | V8405      | Up32          |
| CG1499  | V102187    | Up 32         |
| CG15629 | V108604    | Up 40         |
| CG15822 | V100293    | Up 32 more 40 |
| CG16733 | V105889    | Up 40         |
| CG17137 | V44768     | Up 32         |
| CG17271 | V103101    | Up 32         |
| CG17530 | V100632    | Up 40         |
| CG17834 | V103308    | Up 32         |
| CG1969  | V103542    | Up 40         |
| CG2157  | V51069     | Up 32 more 40 |
| CG2556  | V108504    | Up 40         |
| CG3285  | V52669     | Up 32 more 40 |
| Wdp     | V37208     | Up 40         |
| Indy    | V9982      | Up 40         |
| CG4386  | V109488    | Up 32 more 40 |
| CG4666  | V109818    | Up 40         |
| CG5001  | V103761    | Up 32         |
| CG5065  | V101744    | Up 32 more 40 |
| CG5431  | V104303    | Up 40         |

|        |         |               |
|--------|---------|---------------|
| CG5800 | V103679 | Up 32 more 40 |
| CG5873 | V14374  | Up 32         |
| CG5987 | V103773 | Up 32         |
| CG6055 | V106554 | Up 40         |
| Quail  | V100856 | Up 32 more 40 |
| CG6816 | V104180 | Up 40         |
| CG7356 | V103601 | Up 32         |
| CG7442 | V106555 | Up 32         |
| CdsA   | V103415 | Up 40         |
| CG8180 | V102576 | Up 32         |
| CG8192 | V13979  | Up 32 more 40 |
| CG8425 | V44050  | Up 32 more 40 |
| CG8790 | V103757 | Up 32 more 40 |
| CG8854 | V23631  | Up 32 more 40 |
| CG9089 | V40966  | Up 40         |
| CG9121 | V46328  | Up 32         |
| CG9134 | V108295 | Up 32         |
| CG9149 | V108623 | Up 40         |
| CG9285 | V6296   | Up 32         |
| CG9664 | V42467  | Up 40         |
| CG9665 | V23720  | Up 32         |
| Fal    | V24085  | Up 32         |

## Supplemental Figure Legends

Fig. S1. (A) A 36 hr pupal wing. (B) A 40 hr pupal wing. (C ) A 42 hr pupal wing. Note the folding of the wing as wing cell expansion proceeds. (D) Chitin staining of a 42 hr pupal wing. All of the hairs stain. (E-H) F-actin in a 42 hr pupal wing. Starting at the level of the hairs in E each subsequent image is from a scan 2 um lower into the cell. Note the apical hairs and the foci of F-actin just below the apical surface of the wing. (J) Chitin staining of a 36 hr pupal wing. Note the lack of staining. (K-N) F-actin in a 36 hr pupal wing. Starting at the level of the hairs in E each subsequent image is from a scan 2 um lower into the cell.

Fig S2. *dyl* alters hair polarity in unmounted wings. (A). The D region of an unmounted wing *dyl*<sup>M102880</sup>/*Df* wing. Note the many hairs that display abnormal polarity (some are marked by red arrows). (B) A flip out *dyl* kd clone (outlined) in the D region of an unmounted wing. Note the distal polarity of the wild type cells and the abnormal polarity of clone cells that show a relatively mild morphology phenotype (noted by red arrows). (C) A flip out *dyl* kd clone (outlined) in the A region of an unmounted wing. Note the distal polarity of the wild type cells and the abnormal polarity of clone cells that show a relatively mild morphology phenotype (noted by red arrows).

Fig S3. Gliotactin flip out kd clones show a distinct PCP phenotype. (A). A low mag SEM of a Gli kd clone. (B) A higher magnification image of part of (A). Arrowheads point to hairs that show abnormal polarity due to the hair and base being at an abnormal angle to the wing blade.

Fig S4. Dyl antibody staining is specific in 36 hr pupal wings. (A) Dyl antibody staining of a *ptc-Gal4/UAS-dyl RNAi* wing. Note the lack of staining within the *ptc* domain. (B) Merge of A and C. (C) F-actin staining of the same wing shown in A. Also note the relatively strong Dyl antibody staining at the base of the hair.

Fig S5. *dyl* flip out clones lead to the nonautonomous accumulation of Dyl. (A). The accumulation of exogenous Dyl (immunostaining) is shown in green. Due to its relative faintness the staining of the endogenous Dyl in the wild type hairs is not visible. (B). A merge of A and C with LacZ staining to show the mutant cell nuclei. Note the mutant nuclei appear to be displaced from the clone as assayed by Dyl expression. This is due to the nuclei being at a lower focal plane and the apical basal axis of the cells not being perfectly aligned with the microscope axis. (C). F-actin staining of the cells to mark the growing hairs. Note the retarded and abnormal hairs (arrows) produced by wild type cells that are below the non-autonomous Dyl accumulation. Panels DEFGH are Z sections that go through a typical *dyl* ex clone. (D) F-actin (red) and Dyl (green). (E) F-actin (red). (F) Dyl (green). (G). LacZ (blue). (H) Dyl and LacZ. Note the Dyl is apical and spreads beyond the LacZ.

Fig S6. Consequences of expressing DN-Rab11. (A) The legs of a *ptc-Gal4 Gal80ts/DN-Rab11* pharate adult raised at 29.5°C. Note the shortened and deformed legs. (B) The legs of a *ptc-Gal4 Gal80ts/DN-Rab11* pharate adult raised at 29.5°C. Note the shortened and deformed legs. (C) The notum from a *Gal80ts/DN-Rab11* pharate adult raised at 27.5°C until wpp and then shifted to 29.5°C. The arrow points to the scutellum, which is small and lacks bristles.

Fig S7. Rab11 and hair morphogenesis. (A). F-actin staining of a 38 hr *ptc-Gal4/UAS-GFP-Rab11* wing. (B) A merge of A and C. Note that at this late stage Rab11 is concentrated at the base of the hair. (C) The wing from A showing GFP-Rab11. (E). GFP-Rab11 in a 32 hr *ptc-Gal4/ UAS-GFP-Rab11* wing. (F) GFP-Rab11 in a 32 hr *ptc-Gal4/ UAS-GFP-Rab11; mwh* wing. The arrows point to cells where the early accumulation of GFP-Rab11 is broader than that seen in a wild type wing.

Fig S8. GFP-Rab11 across the cell. (A) A micrograph of a region of a *ptc-Gal4/UAS-GFP-Rab11* pupal wing. The image is of direct visualization of GFP (no staining). The black line is an example of how we assessed the concentration of GFP-Rab11 as a function of distance from the base of the hair to the other end of the cell. (B). A plot of the change in GFP intensity as a function of distance from the base of the hair. The data are for a collection of 20 cells.

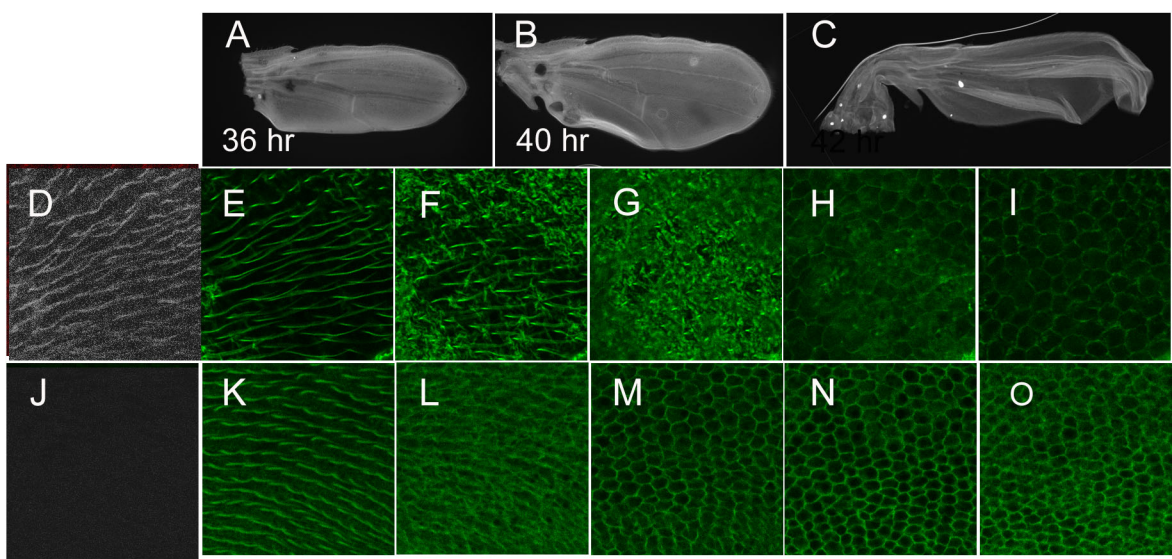

Fig S1

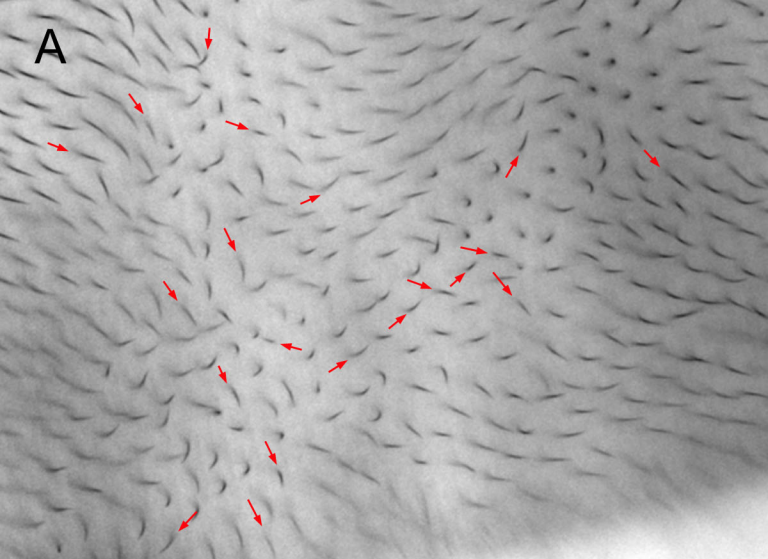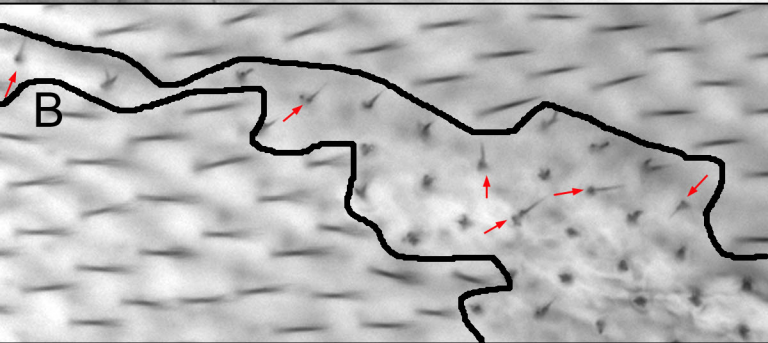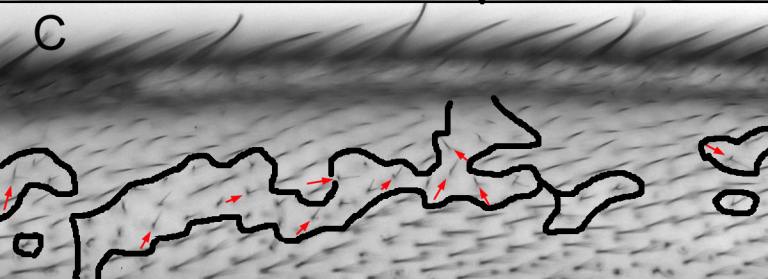

S2



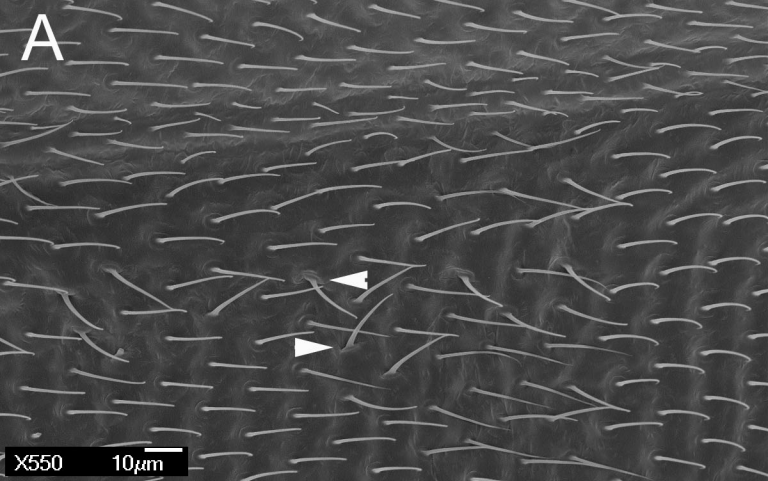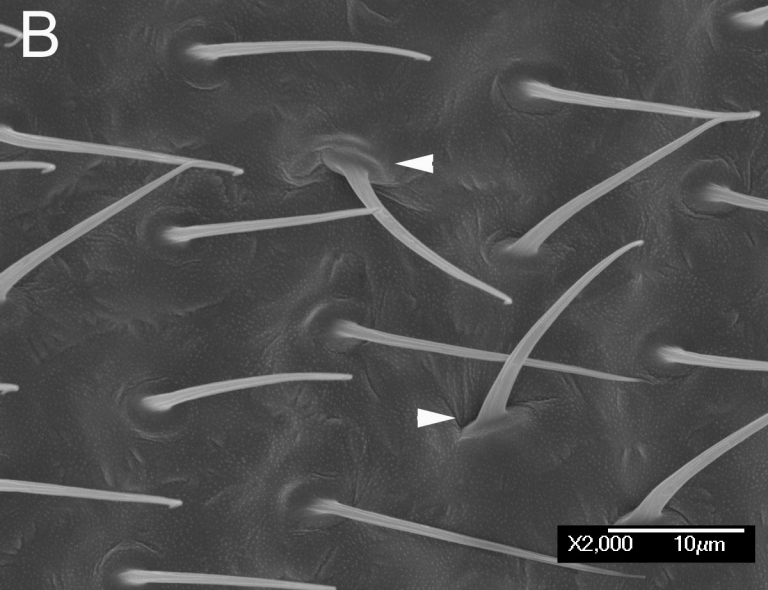

A

*ptc* domain

Dyl

B

C

F-actin

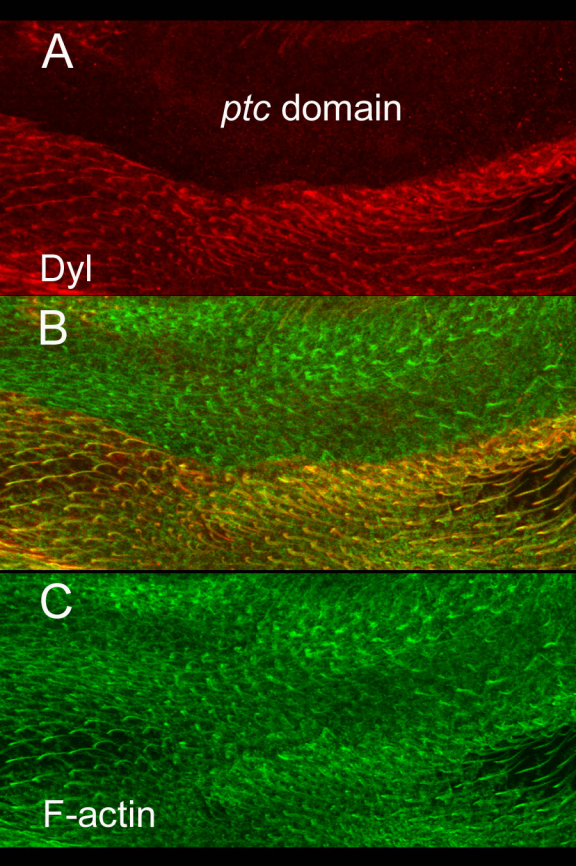

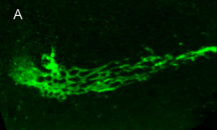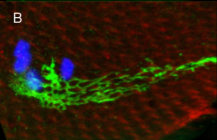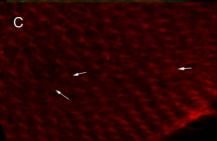

S5

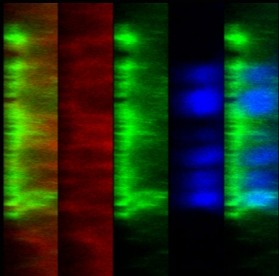

D

E

F

G

H

**A**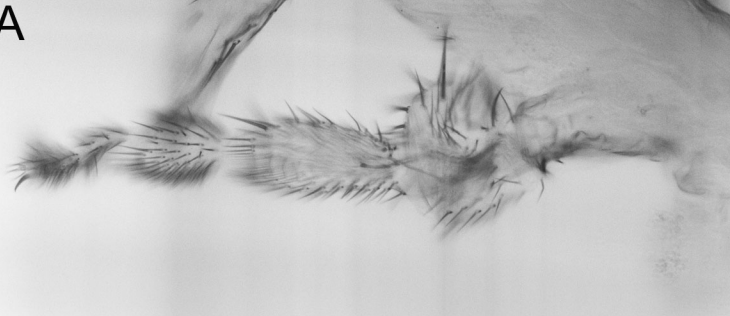**B**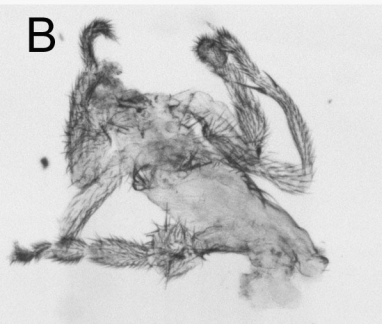**S6****C**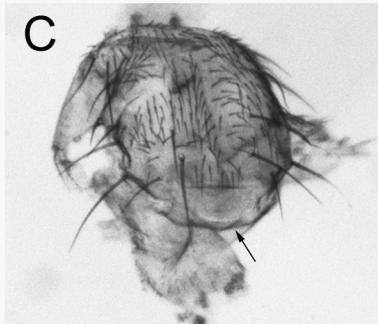

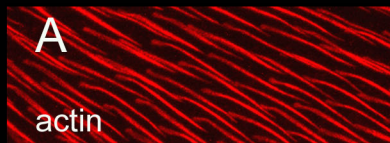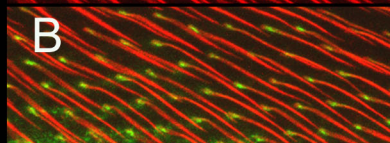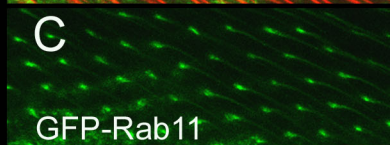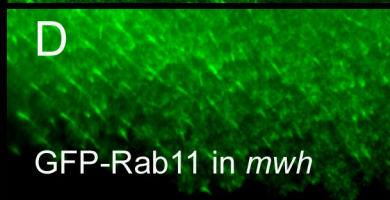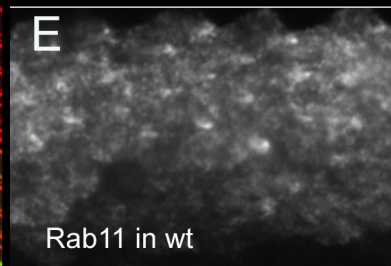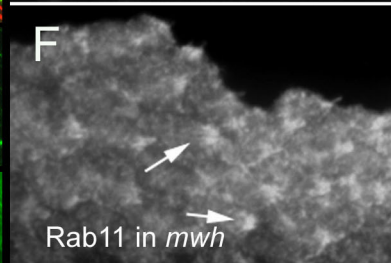

Fig. S4

Fig S5

A

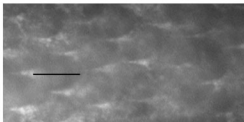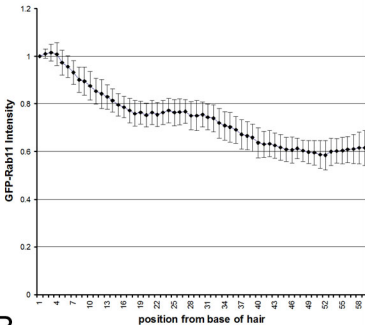

Supplement: NIHMS471153-supplement-01.pdf [file NIHMS471153-supplement-01.pdf]
